# Supplementary material for: Solar forced diurnal regulation of cave drip rates via phreatophyte evapotranspiration
Source: Copernicus journal article supplement (doi:10.5194/hess-2016-11), 2016-02-15
Supplement: Supplementary file [file hess-2016-11-AC1-supplement.pdf]

Dear Dr Blume,

On behalf of the authors I would like to thank the two anonymous reviewers for their time and efforts in providing detailed and thoughtful feedback that I am confident will greatly improve the manuscript.

As requested we have provided a detailed response to each comment and query raised by the reviewers. We will provide a revised version of the manuscript should our response be deemed competent. Please do not hesitate to contact me if you require further information.

Kind regards,

Katie

1 **Anonymous Reviewer #1**

2 The dominance of a particular flow regime changes over time, for example, older limestone  
3 tends to have higher secondary porosity (more fractures and enlarged conduits) and a lower  
4 primary porosity due to compaction or cementation (Ford and Williams, 1994).

5 The manuscript presents data of drip counts in a cave in Australia. The data are analysed  
6 with a recent signal processing tool which allows to identify the strength and frequency of  
7 periodic signals in a time series. A specific feature of the method is that it allows to identify  
8 consecutive periods of the time series which show a periodic signal. This is important for  
9 this dataset of cave drip water because there are only a few days within almost two years of  
10 measurement which show periodic / diurnal signals. However, the signals are not consistent  
11 in space that means they are different at other locations in the cave and they are not  
12 consistent in time, that means they do not occur at similar periods. Furthermore the phase of  
13 the signals is also not consistent. These spurious occurrences of the periodic signal may  
14 render the finding of a periodic signal as less important. Still its diagnosis is one of the most  
15 important and direct results of this manuscript. For the rest of the manuscript the authors  
16 try to argue about the origin of the periodic signal. They discuss several earlier proposed  
17 causes of the diurnal signal and argue that only a root water uptake could be a reasonable  
18 cause. However, there is no direct evidence being presented to undermine this discussion.  
19 Therefore I recommend to be much more careful in the wording, e.g. L536 “this is the first  
20 volumetric observation of tree water use in cave drip water”. I have found a number of  
21 other issues, see below, which need clarification. Nevertheless, I think that these issues can  
22 be resolved within a thorough revision of the manuscript.

23 **Major remarks**

24 - How representative is the drip measurement? The data shown in Fig. 2 seems to be rather  
25 variable and site dependent.

26 Thank you for this comment. The drip sites were chosen using a stratified sampling method.  
27 A transect of the cave was used to select three locations (G, M and LR) that satisfied the  
28 following criteria 1) there were actively dripping speleothems, 2) spatially distant from the  
29 other locations and 3) different depths within the cave. Individual drips were sampled  
30 randomly at each location, with selection guided by practical constraints such as the  
31 stalagmite surface being suitable for placement of a logger and the drip falling from high  
32 enough to activate pressure sensor on logger etc. We will include a more detailed site  
33 description to address this issue.

34 - In the methods section radiation data is being mentioned, but is not used!

35 We thank the reviewer for this comment. The radiation data was used to calculate daily  
36 evapotranspiration as explained in lines 137-140:

37 “The climate parameters used were air temperature (mean, maximum and minimum),  
38 relative humidity (mean, maximum and minimum), wind speed and solar radiation.”

39 - Abstract L31: unclear what is meant with “trends in drip rate at different timescales”

40 Thank you for raising this point. We will reword this phrase to make it clearer. This is the  
41 first observation of tree water use in cave drip water and has important implications for  
42 karst hydrology in regards to developing a new protocol to determine the relative  
43 importance of trends in drip rate, such as diurnal oscillations, and how these trends change  
44 over timescales of weeks to years. This information can then be used to infer karst  
45 architecture.

46 - Section 2.1: - Is the cave relevant for paleoclimatic proxies? - What is the approximate  
47 contributing area to the cave?

48 Glory Hole Cave is likely to be relevant for paleoclimate proxies as it is well decorated and in  
49 close proximity (<100 m) to caves that have been used in multi-proxy speleothem based  
50 paleoclimate studies (Webb et al., 2014; Markowska, 2015). The contributing catchment  
51 area is ~1 km<sup>2</sup>. We will add these details to Section 2.1.

52 - Methods 2.2 - why do you estimate daily potential ET when the focus is set to diurnal  
53 variations?

54 Thank you for your queries. The daily potential ET was estimated to show the multi-day  
55 relationship between the presence of drip cycles and ET, rather than just relying on air  
56 temperature. We would like to refer the reviewer to lines 282-285, lines 388-392 and lines  
57 398-404.

58 - Section 2.3 spectral analysis - clearly describe input and outputs - what is the form of the  
59 periodic signal, is it sinusoidal? - By which criteria did you determine the presence of a  
60 periodic signal?

61 Thanks for your queries. We have revised the section describing the synchrosqueezing (SST)  
62 procedure in the methodology and it is now much clearer in regards to input and output.  
63 The signal does not have to be sinusoidal. If it is, the frequency content will be much  
64 stronger. Otherwise, it will be decomposed into signal components and spread across  
65 frequency bins. We visually identified the presence of periodic signals from the SST plots, as  
66 is clearly described in the manuscript. We clarified many formulations in this section.  
67 Hopefully, this has answered the questions.

68 -Figure 2: - time resolution of drip rates - unit of drip rates

69 We will change the unit of drip rate in Fig 2, thank you for raising this point.

70 -Figure 3: - Y-axis labels on left panels are hidden - for the SST panels it is unclear which time  
71 series is transformed? - how is the presence of a significant periodic cycle determined from  
72 these plots?

73 Y-axis labels have now been redrawn in a new Figure 3. For SST panels, we have clearly  
74 marked the time series in the legend as well as inside the respective panels (labels  
75 correspond to the ones in Table 1 and Figure 2). A response to the last question was given  
76 previously.

77 -Section 4.2.1: the p-value of the t-test is very low suggesting a very low probability of the  
78 Null hypothesis of no difference. Thus there is a significant difference of pressure in cave  
79 and outside. Anyway I doubt if a t-test on the central tendency is the right tool to assess the  
80 ventilation effect. Please check this and revise accordingly.

81 We thank the reviewer for this comment. We agree that a t-test was not the best statistical  
82 approach and have instead used Kendall's Tau which shows a strong correlation (0.82)  
83 significant at 0.05.

84 -Section 4.2.5: the authors mix up long wave radiative exchange processes and L403-413  
85 need to be revised.

86 We thank the reviewer for bringing this to our attention and will revise the text primarily by  
87 removing 'long wave' as a source of incoming radiation.

88 -L433: To my understanding deep root water uptake is only required when the upper soil  
89 layers get too dry and have a lower potential than the soil water at deeper levels. See  
90 papers discussing hydraulic lift (e.g. Dawson, 1996 Tree Physiology, Zapater et al., 2011,  
91 Trees). Therefore I think that in the wetter periods no relevant deep root water uptake  
92 occurs.

93 We thank the reviewer for this information and the suggested references. We agree that  
94 deep root water uptake is only required during drought periods, when the shallow soil is  
95 dry. We will revise the text to reflect the information in the references provided.

96 Minor remarks:

97 - use SI units (L125-L132)

98 We will correct this so that all presented data is in SI units.

99 - L272 wrong reference - it should be Fig.3d

100 Thank you for this comment, this reference will be corrected.

101 - L300f how are recession times being computed?

102 The recession times are calculated from the peak of the hydrograph to the point when the  
103 drip rate returns to the baseline value. We will clarify this in the text accordingly.

104 - L342: there is no Fig 4c

105 Thank you for identifying this mistake, we will correct the reference to Fig 3c.

106 - L439: What is meant with negative hydraulic lift?

107 We thank the reviewer for this comment. Negative hydraulic lift refers to the process when  
108 the transpiration rate is low and water is transported from the roots back into the soil. We  
109 will clarify this sentence along the lines of "Burgess et al (2001) measured sap flow in  
110 Eucalypt tap roots, finding hydraulic lift peaked around 1 pm and negative sap flow values  
111 indicated reverse (acropetal) flow between 7pm- 7am."

112

113

114 **Anonymous reviewer #2**

115

116 In the submitted manuscript Coleborn et al. present a study that deals with the identification  
117 and characterization of daily fluctuations of cave drip rates in a karstic cave in New South  
118 Wales, Australia. They installed drip counters at 12 locations within the cave and use a  
119 method called Synchronizing to identify periods with stable signals of 1 and 2 drip rate  
120 cycles per day (cpds). Such periods could be identified for a subset of the 12 drips, with  
121 varying length and signal type (1 or 2 cpds). Comparing the daily signal of those drips with  
122 explanatory variables such as air pressure differences between the cave and the  
123 atmosphere, the barometric loading due to the daily heating and cooling of air masses,  
124 earth tides due to the gravitational influence of the moon, temperature's influence on water  
125 viscosity, and solar driven cycles of evapotranspiration activity of the plant cover, they show  
126 that evapotranspiration is the most likely reason for daily fluctuations in drip rates. Based on  
127 this finding they develop a conceptual model of the impact of vegetation on drip rates  
128 under different climatic and structural setups. Generally this is a very valuable study. It  
129 reveals understanding of processes that have not been investigated before. The manuscript  
130 is well written and the results are plausible and of high relevance.

131 **We thank the reviewer for recognising the value of this manuscript.**

132

133 However, there are some important revisions to be done before publication. My major point  
134 of criticism is the lack of quantification of the relations between diurnal fluctuations of drip  
135 rates and their explanatory variables. Some few  $r^2$ s and p-values are provided but the most  
136 important part of the discussion (4.2.5. Solar driven daily cycles of vegetative  
137 (phreatophytic) evapotranspiration) could definitely use some more quantification of the  
138 identified relationships and their significance.

139 **Thank you for these comments; we will address your concerns point by point below.**

140 **Some specific comments:**

141 1. The introduction needs some information of the relevance of this type of research.

142 **We thank the reviewer for bringing this to our attention. We agree that this study has**  
143 **important implications for understanding karst unsaturated flow processes and karstic**  
144 **groundwater recharge. Currently, most karst models use very simplistic representations of**  
145 **unsaturated flow, if it is considered at all (Hartmann et al., 2014a). This study highlights the**  
146 **importance of vegetation dynamics on vadose flow and recharge making it significant to**  
147 **karst modelling research and speleothem-based paleoclimate studies which focus on the**

148 impact of vegetation dynamics on proxy records (Treble et al., 2015, accepted for  
149 publication 8/4/16).

150 2. The spectral analysis explained in too little detail (schematic figure could be helpful)

151 This issue was also raised by reviewer #1, and we have expanded the description in  
152 response. The synchrosqueezing transform methodology was developed and tested by  
153 other reviewers, and going into detail exceeds the framework of this manuscript. We have  
154 referenced all works required by the interested reader to familiarise with SST.

155 3. It is not clear whether the selection of periods of stable cycle per days was based on a  
156 threshold procedure ore done manually and subjectively.

157 We thank reviewer #2 for their comment which was also raised by reviewer #1. We visually  
158 identified the presence of periodic signals from the SST plots, as is clearly described in the  
159 manuscript. We clarified many formulations in this section. Hopefully, this has answered the  
160 questions.

161 4. Implications for karst recharge assessment are missing in the discussion.

162 We thank the reviewer for recognising the wider implications of our research and for  
163 providing these excellent references. This study clearly demonstrates the potential for  
164 vegetation to impact karst water recharge making this research relevant to karst modelling  
165 and karst water resources assessment. Currently, there are no approaches that consider the  
166 impacts of vegetation on recharge dynamics in process-based karst models (Hartmann et al.,  
167 2014b, 2015) or in empirical recharge estimation approaches (Allocca et al., 2014; Andreo et  
168 al., 2006).

169 Please see the attached commented version of the manuscript for further details.

#### 170 Comments within text

171 -Not necessarily → please check and cite standard Karst literature as

172 Goldscheider, N., Drew, D., 2007. Methods in Karst Hydrogeology. Taylor & Francis Group,  
173 Leiden, NL.

174 Ford, D.C., Williams, P.W., 2013. Karst Hydrogeology and Geomorphology. John Wiley &  
175 Sons.

176 We thank the reviewer for this suggestion. After consulting Ford and Williams (1994) we will  
177 reword the sentence “the dominance of a particular flow regime changes over time, for  
178 example, older limestone tends to have higher secondary porosity (more fractures and  
179 enlarged conduits) and a lower primary porosity due to compaction or cementation (Ford  
180 and Williams, 1994).

181

182 - also worth citing:

183 Arbel, Y., Greenbaum, N., Lange, J., Inbar, M., 2010. Infiltration processes and flow rates in  
184 developed karst vadose zone using tracers in cave drips. *EarthSurf. Process. Landforms* 35,  
185 1682–1693. doi:10.1002/esp.2010

186 Lange, J., Arbel, Y., Grodek, T., Greenbaum, N., 2010. Water percolation process studies in a  
187 Mediterranean karst area. *Hydrol. Process.* 24, 1866–1879.

188 Sheffer, N.A., Cohen, M., Morin, E., Grodek, T., Gimburg, A., Magal, E., Gvirtzman, H., Nied,  
189 M., Isele, D., Frumkin, A., 2011. Integrated cave drip monitoring for epikarst recharge  
190 estimation in a dry Mediterranean area, Sif Cave, Israel. *Hydrol. Process.* 25, 2837–2845.  
191 doi:10.1002/hyp.8046

192 **We thank the reviewer for suggesting these references and agree that they are relevant to**  
193 **the manuscript. We will include them in the manuscript citations.**

194

195 -Please add short paragraph on the relevance of such investigations in terms of  
196 understanding Karst unsaturated flow processes and karstic groundwater recharge,  
197 paleoclimate reconstructions etc. Most karst models use very strong simplifications of  
198 unsaturated karst flow processes, if they consider unsaturated flow at all.

199 Hartmann, A., Goldscheider, N., Wagener, T., Lange, J., Weiler, M., 2014. Karst water  
200 resources in a changing world: Review of hydrological modelling approaches. *Rev. Geophys.*  
201 52, 218–242. doi:10.1002/2013rg000443

202 **We thank the reviewer for this comment and for providing a suggested citation. We would**  
203 **like to direct their attention to our response to ‘Specific Comment #2’ above.**

204 -don't want to be picky but the meaning of "AHD" might not be obvious to everybody.

205 **We thank the reviewer for this comment; we will expand the acronym to “Australian Height**  
206 **Datum” for clarity.**

207

208 -Is this true for all types of drips? Is there some uncertainty involved. Please provide shortly  
209 Some more detail why this exact volume per drop of water is valid.

210 **Thank you for this comment, the cited paper is an experimental study where the effect of**  
211 **spherical stalactite diameter and flow rate on drop volume. There is uncertainty when**  
212 **estimating drop size because the volume changes over time because of variation in flow rate**  
213 **and the changing morphology of the stalactite. For example, the diameter of the tube in a**  
214 **soda straw formation could shrink during a period of low flow rate leading to a smaller drop**  
215 **volume. It is also impossible to quantify the error of these estimates without measuring**  
216 **physical volumes. We argue that the drop volume 0.19 ml is a reasonable assumption as this**  
217 **value was used in a study conducted at the same site in a cave with a similar distribution of**  
218 **stalactite radii and formation (Markowska et al. 2015). We will include a more detailed**  
219 **explanation in the amended manuscript.**

220 -So is it Potential evaporation? Please clarity.

221 It is potential evaporation; we will clarify this in the text. Thank you for bringing this point to  
222 our attention.

223 -The elaborations of this method are not detailed enough. Also there is too much  
224 referencing of secondary literature. Please add some more elaborations, desirably a small  
225 sketch that show how the method works schematically.

226 This issue was also raised by reviewer #1, and we have expanded the description in  
227 response. The synchrosqueezing transform methodology was developed and tested by  
228 other authors working in the field of signal processing. Going into detail here exceeds the  
229 framework of this manuscript. We recognise that SST is a brand new technique, and that  
230 many readers would be unfamiliar with it. We have therefore clearly referenced all works so  
231 that interested readers can familiarise with this spectral analysis technique.

232  
233 -Was there a systematic threshold or were stable cpds selected manually. A systematic  
234 selection would be desirable.

235 We used manual visual identification the presence of periodic signals from the SST plots, as  
236 is clearly described in the manuscript (lines 160-162).

237 -Please set y-axis to 0, With the present soaking it is difficult identifying when the drips  
238 actually fall dry.

239 Thank you for this suggestion, we will make the changes to Fig 2 so that y-axis starts at 0.

240 - Correlation?

241 We thank the reviewer for this suggestion. We chose the phrase 'connection' rather than  
242 'correlation' because the statement is not based on a statistical outcome.

243 -Less permeable ?

244 Thank you for this suggestion, we will make the suggested change in the text.

245  
246 -Other studies also show this type of behavior. Please see for example the three studies on  
247 cave drip investigations in Israel that I mentioned in a previous comment.

248 We thank the reviewer for this suggestion, we agree that these references are relevant and  
249 we will add the citations in the text.

250  
251 -What about hydraulic connectivity? When percolating waters passed the regions where  
252 evapotranspiration takes place evaporation won't affect its flow percolation rate any more,  
253 right?

254 We thank the reviewer for this comment. If the unsaturated zone above the cave had a  
255 homogenous hydraulic connectivity, we would expect there to be no spatial or temporal  
256 variability in the occurrence of the daily oscillations. However, this is not the case and we



257 argue the heterogeneity in karst architecture primarily controls the spatial and temporal  
258 variation in the presence of the daily oscillations, however, hydraulic connectivity does not  
259 cause the phenomenon. Thus, we argue that it would not be appropriate to include  
260 hydraulic connectivity here as suggested because this paragraph discusses possible drivers  
261 of the daily oscillations.

262 -Can you quantify the T amplitude - strength of cpd signal relationship?

263 We thank the reviewer for this comment. We found that the T amplitude-strength of cpd  
264 signal relationship was quite complex, which we argue is further evidence that this is a  
265 biological process rather than a physical one. Unfortunately, we could not quantify this  
266 relationship but argue, nonetheless, that it is an interesting outcome from this study. We  
267 will reword the text to ensure a statistical relationship is not alluded to.

268 -How strong is the relationship? Is it significant?

269 The relationship between 2-day moving average of air temperature and drip rate during the  
270 period 1/2/14- 19/2/14 is significant and weak ( $\tau = -0.21$ , significant at 95%). We will amend  
271 the text to reflect this information.

272 -Can you quantify the negative relationship between cloud cover and strength of cpd signal?

273 Thank you for this query. We do not use cloud cover data, rather we use daily ET to examine  
274 the relationship between radiation and cpd signal on a multi-day timescale and air  
275 temperature as a proxy for ET on a sub-daily timescale. We would like to direct the reviewer  
276 to our response above regarding the T amplitude-strength of cpd signal relationship.

277 -This subsection is quite long, moving this statement to the implications in the next  
278 subsection could shorten it

279 Thank you for this suggestion. We argue that this paragraph is needed here so there is a  
280 logical flow from discussion of solar radiation to evapotranspiration. However, we agree  
281 that this section is too long and will insert a further subsection '4.2.5.1 Scenarios for solar  
282 driven daily cycles of phreatophytic evapotranspiration' to reduce the length of this section.

283

284 -I really like the conceptual elaborations in Fig 6. They could be improved when adding small  
285 graphs of expected daily variation of drip rates in the 9 Figures (similar to Fig 7 in Barbera &  
286 Andreo, 2011)

287 Barberá, J.A., Andreo, B., 2011. Functioning of a karst aquifer from S Spain under highly  
288 variable climate conditions, deduced from hydrochemical records. Environ. Earth Sci. 65,  
289 2337–2349. doi:10.1007/s12665-011-1382-4

290 Thank you for this suggestion, we had similar graphs on the original sketch and we will add  
291 them into the Fig 6.

292 -The outcomes of this study are clearly relevant for paleoclimte reconstructions by  
293 speleothems, as well explained in this subsection. But the implications are also of highest  
294 relevance for karst modeling and karst water resources assessment.

295 There are still no approaches that do consider the impacts of vegetation on recharge  
296 dynamics, neither in process-based karst models (Hartmann et al., 2014, 2015) nor in  
297 empirical recharge estimation approaches (Allocca et al., 2014; Andreo et al., Andreo et al.,  
298 2008)

299 Allocca, V., Manna, F., De Vita, P., 2014. Estimating annual groundwater recharge coefficient  
300 for karst aquifers of the southern Apennines (Italy). *Hydrol. Earth Syst. Sci.* 18, 803–817.  
301 doi:10.5194/hess-18-803-2014

302 Andreo, B., Vías, J., Durán, J., Jiménez, P., López-Geta, J., Carrasco, F., 2008. Methodology  
303 for groundwater recharge assessment in carbonate aquifers: application to pilot sites in  
304 southern Spain. *Hydrogeol. J.* 16, 911–925.

305 Hartmann, A., Gleeson, T., Rosolem, R., Pianosi, F., Wada, Y., Wagener, T., 2015. A large-  
306 scale simulation model to assess karstic groundwater recharge over Europe and the  
307 Mediterranean. *Geosci. Model Dev.* 8, 1729–1746. doi:10.5194/gmd-8-1729-2015

308 Hartmann, A., Mudarra, M., Andreo, B., Marín, A., Wagener, T., Lange, J., 2014. Modeling  
309 spatiotemporal impacts of hydroclimatic extremes on groundwater recharge at a  
310 Mediterranean karst aquifer. *Water Resour. Res.* 50, 6507–6521.  
311 doi:10.1002/2014WR015685

312

313 We thank the reviewer for their comments; we would like to refer them to “Specific  
314 Comment #4” which we believe addresses their queries.
